# Supplementary material for: Primary school teachers’ patterns in using communication-supporting strategies following a professional development program: lessons learned from an exploratory study with three teachers
Source: Frontiers journal article supplement (doi:10.3389/feduc.2023.1036050), 2023-06-27
Supplement: Data_Sheet_1.pdf [file Data_Sheet_1.pdf]

## Appendix 1

Example of strategy coding.

Activity: The teacher is discussing a text about hedgehogs with the children.

T = teacher

C1-5 = children

[code]

- 1 C1: At my grandmother there is a hedgehog.
- 2 C1: About this big.
- 3 C1: It's in the garden all the time.
- 4 T: Has anyone else seen a real hedgehog? [OTH]
- 5 T: Have you seen a hedgehog? [OTH]
- 6 C2: Yes.
- 7 T: Would you like to share? [ENC]
- 8 C2: No, I forgot what to say.
- 9 T: Okey. [OTH]
- 10 C1: I have not seen a hedgehog in the day time.
- 11 C1: I have seen it coming out at night time.
- 12 T: Exactly. [OTH]
- 13 T: Because you should look for them when it's dark. [EXT]
- 14 T: Because then they are awake and move around. [EXT]
- 15 T: But what does the hedgehog use to find food? [OPE]
- 16 C3: Its nose.
- 17 T: Why doesn't it use the eyes instead? [OPE]
- 18 C4: It cannot see so well.
- 19 T: Yes, right. [OTH]
- 20 T: They use their sense of smell [LAB]
- 21 T: Because they have bad vision [LAB]
- 22 T: What senses do you think we use the most? [OPE]
- 23 C5: We use our eyes the most.
- 24 C4: You actually use the brain the most.
- 25 C4: Because then you live.
- 26 T: Yes, that's right. [OTH]
- 27 T: You use the brain. [EXT]
- 28 T: Otherwise our senses would not work. [EXT]
- 29 T: Would you like to learn more about hedgehogs? [OTH]
- 30 C3: Yes, I want to.
- 31 T: What would you like to know about hedgehogs? [OPE]
